# Supplementary material
Source: publisher figshare collection journal article supplement (https://sage.figshare.com/ndownloader/files/13569095)
Supplement: Supplementary file 1 [file 13569095]

**Table 1 Supplement: City Sample**

From a list of the 792 local governments with populations over 50,000 across the U.S. (U.S. Census Bureau 2012), a sample of 83 cities was selected with a random number generator. 2014 sample (N=83) listed alphabetically. Data include city, state, total number of e-government services (3 maximum), population, median income, and percent of population living in poverty. Sunrise, FL and Port St. Lucie, FL were excluded from the analysis due to missing revenue data.

| City         | State | Total E-Gov<br>Services | Population<br>(2012) | Median<br>Income | Poverty % |
|--------------|-------|-------------------------|----------------------|------------------|-----------|
|              |       | (31 max.)               |                      |                  |           |
| Albany       | GA    | 14                      | 77,431               | \$28,871         | 34.1%     |
| Albuquerque  | NM    | 18                      | 555,417              | \$47,399         | 17.3%     |
| Alexandria   | VA    | 21                      | 146,294              | \$83,996         | 8.0%      |
| Allen        | TX    | 14                      | 89,640               | \$101,966        | 4.8%      |
| Appleton     | WI    | 11                      | 73,016               | \$52,605         | 10.5%     |
| Auburn       | WA    | 20                      | 73,505               | \$54,329         | 14.9%     |
| Baltimore    | MD    | 17                      | 621,342              | \$40,803         | 23.4%     |
| Beaumont     | TX    | 17                      | 118,228              | \$40,765         | 22.3%     |
| Bend         | OR    | 16                      | 79,109               | \$52,601         | 12.1%     |
| Bossier City | LA    | 5                       | 64,655               | \$47,290         | 16.6%     |
| Carlsbad     | CA    | 19                      | 109,318              | \$83,875         | 9.7%      |
| Carson       | CA    | 19                      | 93,002               | \$71,653         | 8.5%      |
| Carson       | NV    | 12                      | 54,838               | \$53,987         | 15.0%     |
| Chula Vista  | CA    | 16                      | 252,422              | \$65,364         | 10.4%     |
| Clifton      | NJ    | 12                      | 84,722               | \$64,163         | 9.0%      |
| Daly City    | CA    | 14                      | 103,690              | \$72,762         | 7.8%      |
| Danbury      | CT    | 14                      | 82,807               | \$66,281         | 10.1%     |
| Delray Beach | FL    | 18                      | 62,357               | \$50,935         | 14.7%     |
| Des Plaines  | IL    | 15                      | 58,840               | \$65,194         | 7.0%      |
| Duluth       | MN    | 16                      | 86,211               | \$41,311         | 21.9%     |
| Fayetteville | NC    | 9                       | 202,103              | \$44,756         | 17.0%     |
| Flagstaff    | AZ    | 19                      | 67,468               | \$48,676         | 23.3%     |
| Fort Collins | CO    | 23                      | 148,612              | \$53,359         | 18.1%     |
| Fullerton    | CA    | 17                      | 138,574              | \$67,617         | 14.6%     |
| Greeley      | CO    | 15                      | 95,357               | \$44,226         | 23.5%     |
| Gulfport     | MS    | 12                      | 70,113               | \$38,704         | 21.9%     |
| Huntsville   | AL    | 19                      | 183,739              | \$48,632         | 16.3%     |

|                |    |    |           |          |       |
|----------------|----|----|-----------|----------|-------|
| Irving         | TX | 17 | 225,427   | \$49,303 | 16.2% |
| Kansas City    | KS | 13 | 147,268   | \$37,768 | 24.5% |
| Kirkland       | WA | 20 | 50,697    | \$86,656 | 6.1%  |
| La Mesa        | CA | 20 | 58,160    | \$55,744 | 12.8% |
| Lafayette      | IN | 14 | 67,925    | \$39,083 | 18.9% |
| Lake Forest    | CA | 15 | 78,853    | \$93,127 | 5.0%  |
| Lakeville      | MN | 12 | 57,342    | \$92,989 | 4.3%  |
| Lakewood       | CA | 16 | 80,833    | \$78,876 | 7.6%  |
| Lawton         | OK | 10 | 98,376    | \$43,953 | 17.6% |
| Madera         | CA | 6  | 62,624    | \$43,240 | 27.4% |
| Manhattan      | KS | 13 | 56,069    | \$40,650 | 27.2% |
| Margate        | FL | 9  | 55,026    | \$43,565 | 13.9% |
| Medford        | OR | 14 | 76,462    | \$42,244 | 19.9% |
| Minneapolis    | MN | 23 | 392,880   | \$48,881 | 22.5% |
| Mission        | TX | 11 | 80,452    | \$40,513 | 27.0% |
| Moore          | OK | 13 | 57,810    | \$56,892 | 11.3% |
| Mountain       | CA | 22 | 76,621    | \$92,987 | 8.2%  |
| Nashua         | NH | 11 | 86,933    | \$65,671 | 9.3%  |
| New Britain    | CT | 15 | 73,153    | \$39,898 | 22.9% |
| New Haven      | CT | 12 | 130,741   | \$38,482 | 26.9% |
| Norman         | OK | 13 | 115,562   | \$48,248 | 17.6% |
| North          | TX | 16 | 65,290    | \$63,806 | 7.5%  |
| Norwalk        | CT | 17 | 87,190    | \$75,446 | 9.4%  |
| Palatine       | IL | 12 | 69,144    | \$73,811 | 8.5%  |
| Pasadena       | TX | 11 | 152,272   | \$45,843 | 20.9% |
| Pasadena       | CA | 21 | 138,547   | \$68,310 | 12.9% |
| Peabody        | MA | 10 | 51,867    | \$67,052 | 5.6%  |
| Perth Amboy    | NJ | 8  | 51,744    | \$44,166 | 21.2% |
| Placentia      | CA | 15 | 51,673    | \$75,693 | 12.2% |
| Port St. Lucie | FL | 17 | 168,716   | \$49,236 | 13.8% |
| Rapid City     | SD | 10 | 69,854    | \$45,707 | 16.1% |
| Reading        | PA | 12 | 88,102    | \$27,206 | 37.9% |
| Richland       | WA | 18 | 51,440    | \$68,744 | 8.9%  |
| Roseville      | CA | 19 | 124,519   | \$74,579 | 8.3%  |
| Royal Oak      | MI | 15 | 58,410    | \$62,453 | 7.3%  |
| San Diego      | CA | 19 | 1,338,348 | \$63,990 | 15.4% |
| San Francisco  | CA | 28 | 825,863   | \$73,802 | 13.2% |
| Santa Monica   | CA | 23 | 91,812    | \$72,271 | 11.3% |
| Scottsdale     | AZ | 20 | 223,514   | \$72,163 | 8.3%  |
| Sioux City     | IA | 13 | 82,719    | \$42,845 | 17.3% |
| Spokane        | WA | 21 | 209,525   | \$42,274 | 18.7% |
| Spokane        | WA | 17 | 90,641    | \$48,690 | 14.0% |
| Springfield    | MA | 7  | 153,552   | \$35,163 | 28.7% |
| Springfield    | IL | 16 | 117,126   | \$49,627 | 16.8% |
| Springfield    | OH | 15 | 60,147    | \$33,333 | 29.0% |

|             |    |    |         |           |       |
|-------------|----|----|---------|-----------|-------|
| St. Louis   | MO | 13 | 318,172 | \$34,384  | 27.0% |
| St. Peters  | MO | 14 | 54,078  | \$70,859  | 3.0%  |
| Sugarland   | TX | 16 | 82,480  | \$107,149 | 4.4%  |
| Sunrise     | FL | 13 | 88,843  | \$49,120  | 11.6% |
| Tempe       | AZ | 18 | 166,842 | \$47,882  | 22.2% |
| Thornton    | CO | 17 | 124,140 | \$66,176  | 9.2%  |
| West Allis  | WI | 16 | 60,732  | \$44,066  | 14.2% |
| West Covina | CA | 11 | 107,440 | \$68,677  | 9.3%  |
| Weston      | FL | 13 | 67,641  | \$93,886  | 5.9%  |
| Yakima      | WA | 19 | 93,101  | \$40,569  | 22.9% |
| Yorba Linda | CA | 11 | 66,735  | \$116,881 | 2.8%  |

### **Text 1 Supplement: City Manager Interview Protocol**

We originally selected nine cities to include for interviews by plotting all 83 cities in the sample (before Sunrise, FL and Port St. Lucie, FL were removed from the sample due to missing financial data) on a three by three grid broken down by total number of online services offered and median income. Specifically, median income was divided into low (below \$43,759), medium (between \$43,760 and \$69,800), and high (\$69,801 or above) and total online services was divided into low (11 or fewer), medium (12 to 18), and high (19 or more). This created 9 cells within which a city could fall. After plotting each city in the appropriate cell, we then chose one city from each cell, paying attention to have a variety of population sizes amongst the cities selected and cities from different regions of the country. We contacted each of the selected nine cities to request an interview, and four of the original nine cities agreed to be interviewed (Santa Monica, Scottsdale, Margate, and Port St. Lucie). We then selected five additional cities to contact for interviews, each of which was as similar as possible to each of the original cities that

did not respond. Of these five cities, three agreed to be interviewed (North Richland Hills, Lakeville, and New York City).

1. Could you give me an overview about how e-government is used in \_\_\_\_\_ and the decision making process regarding what services to offer and how they are to be provided?
2. We are interested in understanding why type of online presence your city has and what types of things citizens can use the city website for. To what extent would you say your city is doing the following things?
  - a. Allowing citizens to make payments online (parking tickets, pay fines, property etc.)
  - b. Submit service requests online
  - c. Provide general feedback/communicate with officials online
  - d. Multimedia (watch council meeting online)
  - e. Access documents or records online (for view or for download)
  - f. Using social media

(Group A) If doing a good deal of these things...

3. How or when did the city decide to start making use of these online tools?
4. How has using these online tools helped to achieve:
  - a. Cost savings?
  - b. Effectiveness of providing services?
  - c. Ability to reach citizens?

5. Which online services have you found most useful to your city and why?
6. What challenges does using these online services present?
7. To what degree do citizens make use of these services? What percent of citizens do you believe are aware of and regularly make use of these services?

(Group B) If not doing a good deal of these things...

8. If you aren't making use of all of these online tools, what are the barriers to adoption?  
(Has the city previously discussed using any of these online tools?)
9. Which online services would you want to adopt and why?
10. Which online tools do you think would be most useful from your perspective as city manager?
11. To what degree have citizens requested that the city use these online tools? Are there any online tools in particular that citizens have strongly indicated they would like the city to use?

### **Text 2 Supplement: Data Collection**

During August of 2014, one member of the research team reviewed the websites of all 83 cities included in the original sample. This member of the research team thoroughly examined each city website and coded whether the city offered each of the online services we are interested in. While we originally coded for 32 different e-government services, we chose to exclude the measure of online voter registration from this analysis as some states, such as Texas, only allow residents to download the voter registration form online but require that the resident print the

registration form and mail it to the registrar (Texas Secretary of State 2017), thus taking the decision as to whether or not to offer this service online out of the hands of municipal officials. This left us with a total of 31 services that we consider.

We measure each of these 31 e-government services for each city website, ranging from the widely available (council meeting agenda or city code downloads) to the less common (property registration and business license application). For descriptive statistics of all variables, see Appendix D.

In addition to our measure of the total number of services offered, we combined similar types of services into four broad categories: interactive features (N=27), informational features (N=16), financial/payment features (N=4), and social media features (N=12). Some e-government tools that straddled more than one category were counted in multiple categories. For instance, some payment services are included as both interactive and financial features.

1. Municipal Level Variables:

- a. City name
- b. State
- c. Population rank
- d. Population
- e. Median income
- f. Percent of population living under the poverty line
- g. Population by gender
- h. Population by race
- i. Population by age
- j. Percent of households in metro area with high-speed internet access  
(2013)
- k. Form of government (council-manager or other)
- l. Total revenue per capita from all sources (2012)
- m. Total expenditures per capita on central staff services (2012)

2. E-government services offered by cities:

- a. Pay tickets/fines
- b. Pay taxes
- c. Pay utility bills
- d. Pay for licenses/permits
- e. Property registration
- f. Apply for a business license
- g. Permit application

- h. Register for parks and recs services
- i. Request services (e.g. fix potholes)
- j. Request government records online
- k. View government records online
- l. Interactive maps
- m. City job applications
- n. Download official city forms
- o. Online communication with officials (e.g. e-mail, social media, etc.)
- p. View agenda or minutes
- q. View city codes or ordinances
- r. E-newsletter
- s. Streaming video (e.g. meetings, public forums, etc.)
- t. Video on demand (e.g. meetings, informational videos, etc.)
- u. Instant messaging
- v. Chat rooms
- w. Mobile apps
- x. 311 information available online
- y. Podcasts
- z. E-alerts
- aa. Blogs
- bb. Flickr
- cc. YouTube
- dd. Social media:



- i. Twitter
- ii. Facebook
- iii. LinkedIn
- iv. Tumblr
- v. Instagram
- vi. Google +
- vii. Pinterest
- viii. NixLe
- ix. Foursquare
- x. Nextdoor
- xi. Yelp
- xii. MyConnection

Classification of services:

- 1. Interactive (27):
  - a. Pay ticket/fine
  - b. Pay taxes
  - c. Pay utility bills
  - d. Pay for license/permit
  - e. Property registration
  - f. Apply for business license
  - g. Permit application
  - h. Register for parks/rec

- i. Request services
- j. Request government records
- k. Interactive maps
- l. Job application
- m. Online communication with office holder
- n. Mobile apps
- o. Twitter
- p. Facebook
- q. LinkedIn
- r. Tumblr
- s. Instagram
- t. Google+
- u. Pinterest
- v. NixLe
- w. Foursquare
- x. Nextdoor
- y. Yelp
- z. MyConnection

2. Informational (16):

- a. Request government records
- b. Interactive maps
- c. Downloadable forms

- d. Agenda/minutes
- e. Codes/ordinances
- f. e-newsletter
- g. streaming video
- h. video on demand
- i. mobile apps
- j. podcasts
- k. 311
- l. e-alerts
- m. blogs
- n. flickr
- o. youTube
- p. online government records

3. Social media (12):

- a. Twitter
- b. Facebook
- c. LinkedIn
- d. Tumblr
- e. Instagram
- f. Google+
- g. Pinterest
- h. NixLe

- i. Foursquare
- j. NextDoor
- k. Yelp
- l. MyConnection

4. Payment (4):

- a. Pay ticket/fine
- b. Pay taxes
- c. Pay utility bill
- d. Pay license/permit

**Table 2 Supplement. Summary Statistics**

|                              | N  | mean  | sd    | min   | max   |
|------------------------------|----|-------|-------|-------|-------|
| <b>Dependent Variables</b>   |    |       |       |       |       |
| Total Services               | 81 | 14.93 | 4.147 | 5     | 27    |
| Percent of Total Services    | 81 | 48.15 | 13.38 | 16.13 | 87.10 |
| Total Informational          | 81 | 8.679 | 2.514 | 3     | 15    |
| Percent of Informational     | 81 | 54.24 | 15.71 | 18.75 | 93.75 |
| Total Payment Services       | 81 | 2.049 | 1.059 | 0     | 4     |
| Total Interactive Services   | 81 | 8.753 | 3.231 | 2     | 18    |
| Percent Interactive Services | 81 | 32.42 | 11.97 | 7.407 | 66.67 |
| Social Media (count)         | 81 | 1.877 | 1.100 | 0     | 5     |
| <b>Independent Variables</b> |    |       |       |       |       |
| Council-Manager Form         | 81 | 0.531 | 0.502 | 0     | 1     |

|                                  |    |        |       |       |       |
|----------------------------------|----|--------|-------|-------|-------|
| Percent High Speed Internet      | 81 | 79.67  | 5.699 | 55.20 | 88.50 |
| Percent 18 to 65                 | 81 | 64.63  | 4.256 | 55.08 | 77.19 |
| Total Rev. per capita (thous)    | 81 | 2.380  | 1.736 | 0.064 | 10.05 |
| Central Staff per capita (thous) | 81 | 0.0731 | 0.102 | 0     | 0.809 |
| Population (ln)                  | 81 | 11.53  | 0.652 | 10.83 | 14.08 |

### **Control Variables**

|               |    |       |       |       |       |
|---------------|----|-------|-------|-------|-------|
| Poverty Rate  | 81 | 0.152 | 0.077 | 0.030 | 0.380 |
| Percent White | 81 | 68.40 | 17.34 | 23.58 | 91.67 |

### **Text 3 Supplement: Robustness Checks**

Robustness checks of our models suggest that multicollinearity and heteroskedasticity are not concerns in these models. With regard to multicollinearity, we checked for multicollinearity using Variance Inflation Factors and found that when assessing all of our independent and control variables together, none had a VIF of above 1.53, with an average VIF of 1.35. Therefore, we are satisfied that multicollinearity between the independent variables included in our model is not a problem. With regard to heteroskedasticity, for all models included we conducted a White test and a Breusch-Pagan test, both of which test the null hypothesis that the variance of the residuals is homogenous. In all models, we fail to reject the null, leading us to conclude that our models do not suffer from heteroskedasticity of variance of the residuals.
